# Supplementary material for: Human Keratinocytes Inhibit CD4+ T-Cell Proliferation through TGFB1 Secretion and Surface Expression of HLA-G1 and PD-L1 Immune Checkpoints
Source: MDPI journal article supplement (doi:10.3390/cells10061438), 2021-06-08
Supplement: s1 [file s1]

## Article

# Human Keratinocytes Inhibit CD4<sup>+</sup> T-Cell Proliferation through TGFB1 Secretion and Surface Expression of HLA-G1 and PD-L1 Immune Checkpoints

Guillaume Mestrallet <sup>1,2</sup>, Frédéric Auvré <sup>1,2</sup>, Chantal Schenowitz <sup>3,4</sup>, Edgardo D. Carosella <sup>3,4</sup>, Joel LeMaoult <sup>3,4,\*</sup>, Michèle T. Martin <sup>1,2,\*</sup>, Nathalie Rouas-Freiss <sup>3,4,\*</sup> and Nicolas O. Fortunel <sup>1,2,\*</sup>

<sup>1</sup> CEA, Laboratory of Genomics and Radiobiology of Keratinopoiesis, Institute of Cellular and Molecular Radiobiology, Francois Jacob Institute of Biology, DRF, 91000 Evry, France; guillaume.mestrallet@cea.fr (G.M.); frederic.auvre@cea.fr (F.A.)

<sup>2</sup> Université Paris-Saclay, 91190 Saint-Aubin, France

<sup>3</sup> CEA, DRF, Francois Jacob Institute of Biology, Hemato-Immunology Research Department, Saint-Louis Hospital, 75010 Paris, France; chantal.schenowitz@cea.fr (C.S.); edgardo.carosella@cea.fr (E.D.C.)

<sup>4</sup> U976 HIPI Unit, IRSL, Université Paris, 75010 Paris, France

\* Correspondence: joel.lemaoult@cea.fr (J.L.); michele.martin@cea.fr (M.T.M.); nathalie.rouas-freiss@cea.fr (N.R.-F.); nicolas.fortunel@cea.fr (N.O.F.); +33-1-60-87-34-91 (M.T.M.); +33-1-57-27-68-01 (N.R.-F.); +33-1-60-87-34-92 (N.O.F.)

† These authors contributed equally to this article.

## Supplementary Materials

**Figure S1.** Maps of HLA-G1 and control vectors.

**Figure S2.** Fibroblast supernatant and PBMC proliferation inhibition.

**Figure S3.** HLA-G isoform expressed in keratinocytes.

**Figure S4.** Influence of EGF on PD-L1 expression in keratinocytes.

**Figure S5.** Impact of induced HLA-G1 overexpression on PD-L1 and TGFB1 expression in keratinocytes.

**Figure S6.** Cell-surface expression of the HLA-G receptors ILT2 and ILT4 in keratinocytes.

## Inducible expression of HLA-G1

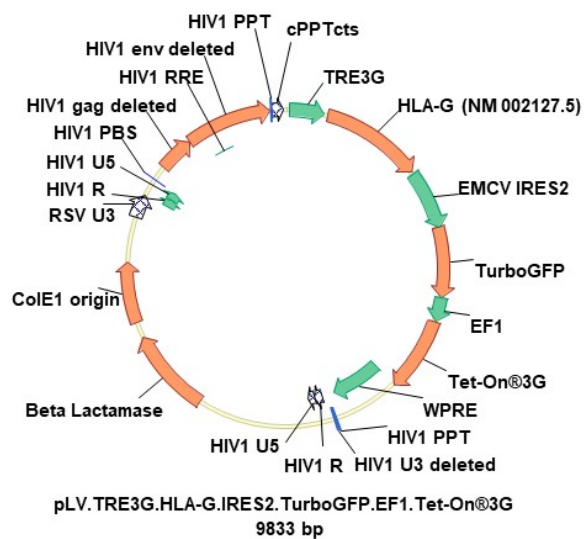

## Inducible expression of RFP (control vector)

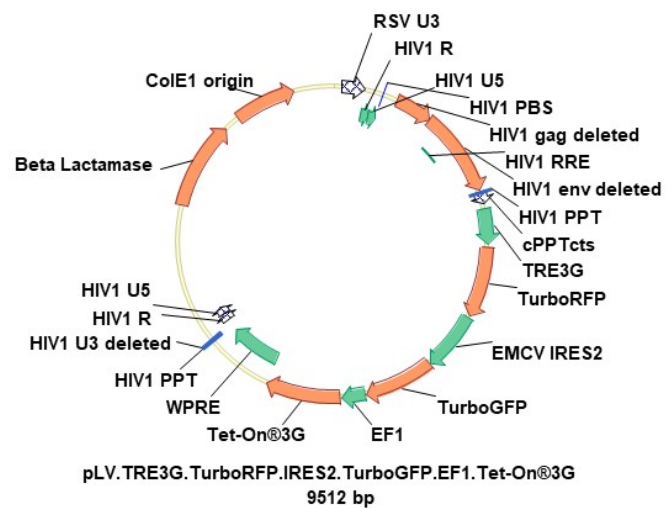

Figure S1. Maps of HLA-G1 and control lentiviral vectors.

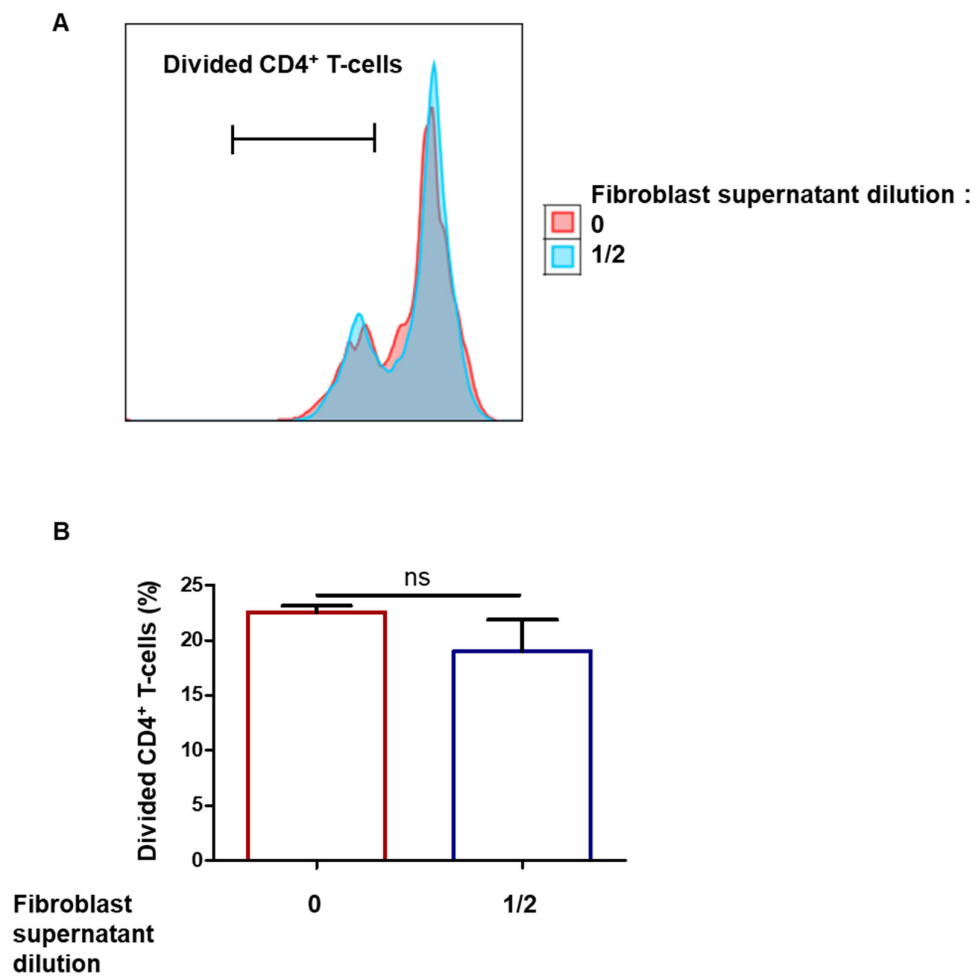

**Figure S2.** Fibroblast supernatant and PBMC proliferation inhibition. Fibroblast supernatants from one representative donor were incubated with 100,000 PBMCs for 7 days. PBMCs were pre-marked with a dye and activated using CD3<sup>+</sup> CD28<sup>+</sup> beads. PBMC proliferation was quantified by dye decrease at day 7. **(A)** Representative flow cytometry profiles at day 7. **(B)** CD4<sup>+</sup> T-cell proliferation depending on presence of fibroblast supernatant (mean+SEM,  $p < 0.05$ ,  $n = 3$ ). Exact  $p$ -values were determined on t-test.

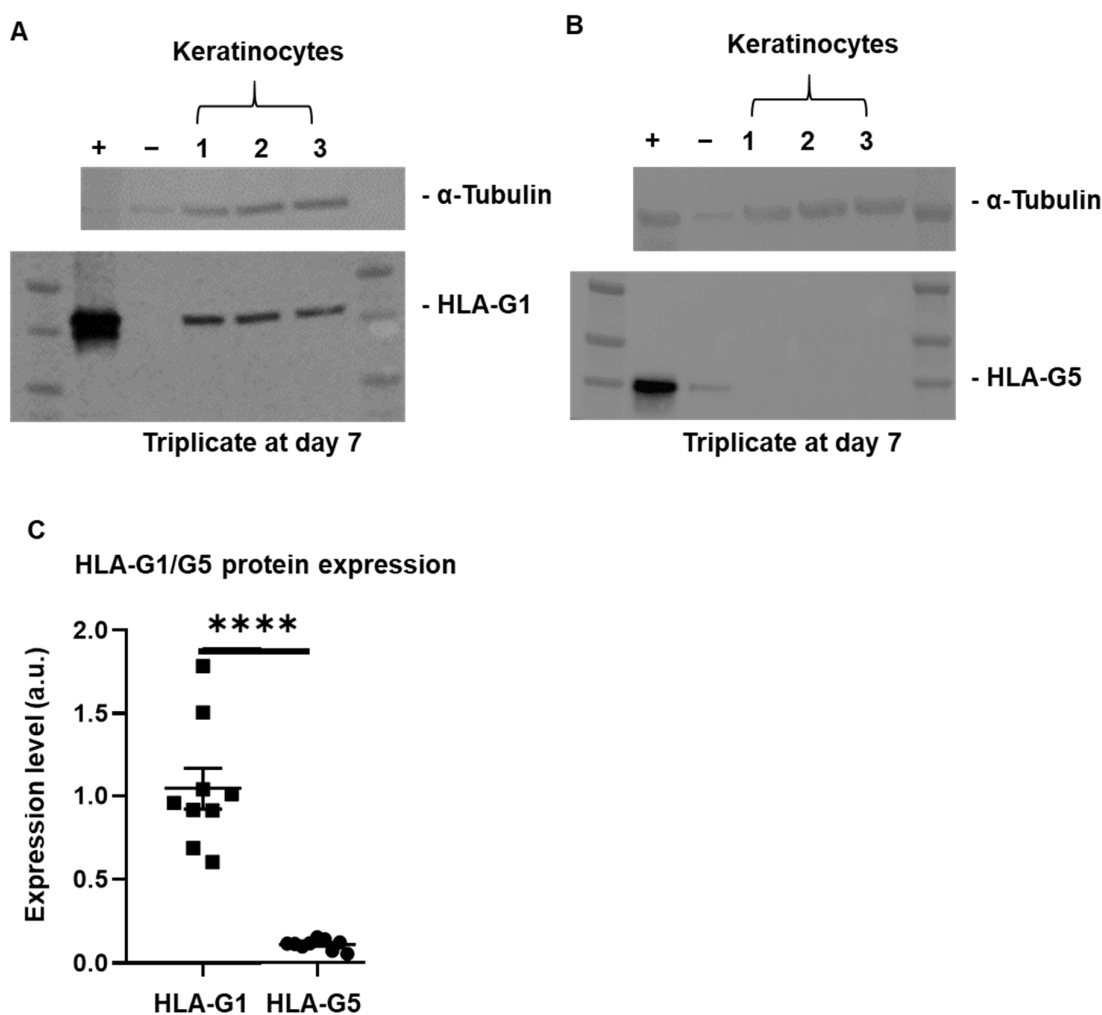

**Figure S3.** HLA-G isoform expressed in keratinocytes. Cells from one representative donor were cultivated for 7 days after removal in an undefined medium with serum and a layer of feeder cells. Analysis by Western blotting. **(A)** Typical gel photograph corresponding to 3 different cultures, with  $\alpha$ -tubulin detection as loading control. K562 cells were used as negative control and K562 cells transduced with HLA-G1 were used as positive control with 4H84 antibody. **(B)** Typical gel photograph corresponding to 3 different cultures, with  $\alpha$ -tubulin detection as loading control. M8 cells were used as negative control and M8 cells transduced with HLA-G5 were used as positive control with 5A6G7 antibody. **(C)** Scatter plot of quantification (mean+SEM,  $p < 0.0001$ ,  $n = 9$ ). Exact  $p$ -values were determined using the Mann-Whitney U-test. \*\*\*\*;  $p < 0.0001$ .

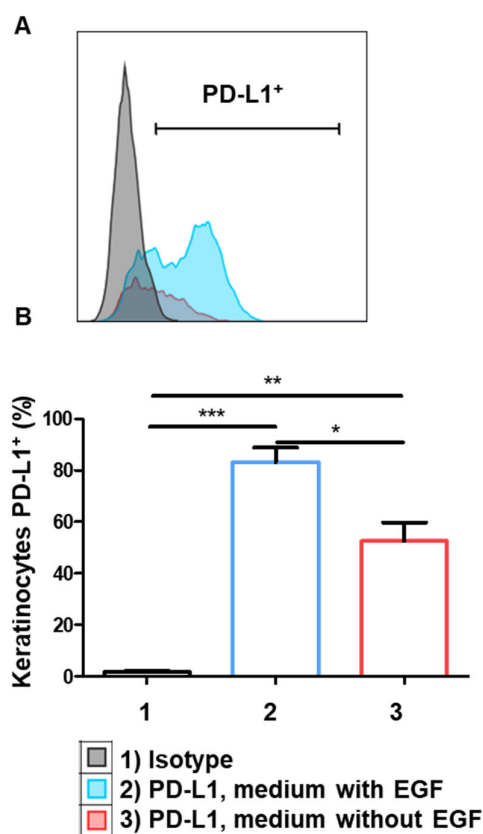

**Figure S4.** Influence of EGF on PD-L1 expression in keratinocytes. Amplified keratinocytes expressing PD-L1 were reamplified with medium with or without EGF. **(A)** Representative cytometry profiles after 7 days. **(B)** PD-L1 expression according to presence of EGF in the medium (mean+SEM,  $p < 0.05$ ,  $n=3$ ). Exact p-values were determined on t-test. \*:  $p < 0.05$ , \*\*:  $p < 0.01$ , and \*\*\*:  $p < 0.001$ .

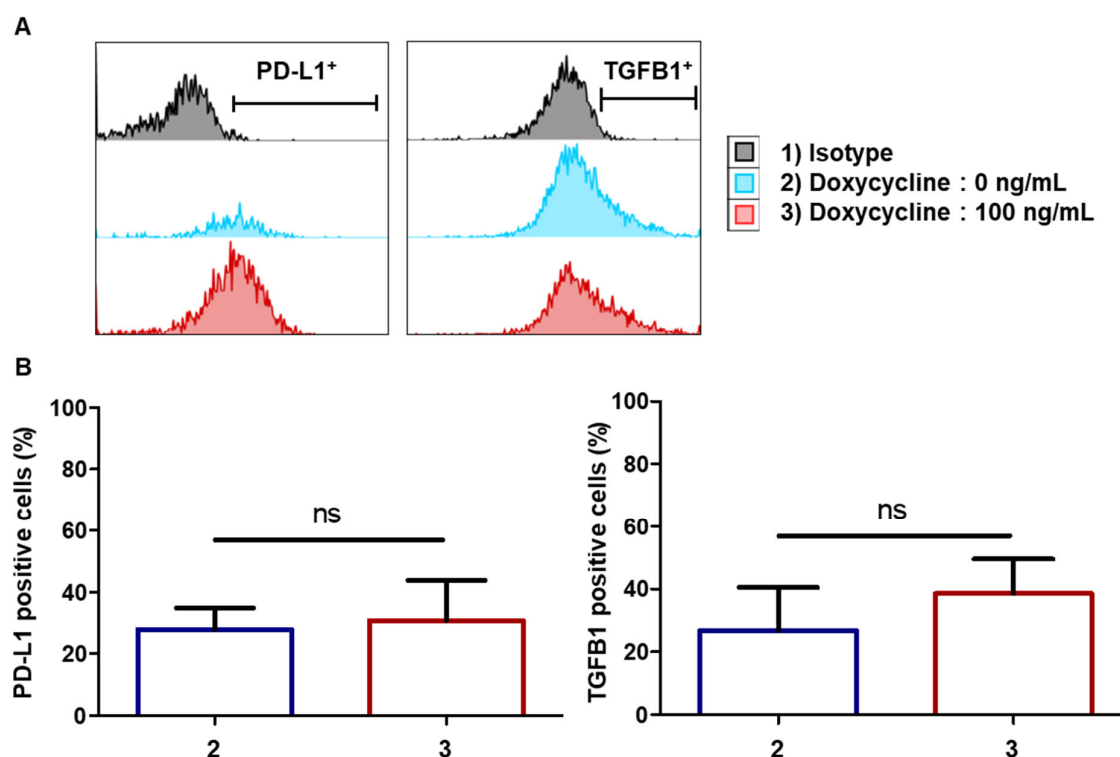

**Figure S5.** Impact of induced HLA-G1 overexpression on PD-L1 and TGFB1 expression in keratinocytes. Keratinocytes cultures of transduced with the lentiviral vector allowing doxycycline-inducible expression of HLA-G1 were maintained for 7 days in induced and non-induced conditions. Expression of PD-L1 and TGFB1 proteins was analyzed in both control and HLA-G1-overexpressing keratinocytes. **(A)** Representative profiles of PD-L1 and TGFB1 expression are shown. **(B)** Absence of PD-L1 and TGFB1 protein expression modulation in response to HLA-G1 overexpression induced by doxycycline treatment (mean+SEM,  $p < 0.05$ ,  $n = 3$ ). Exact p-values were determined using the t-test.

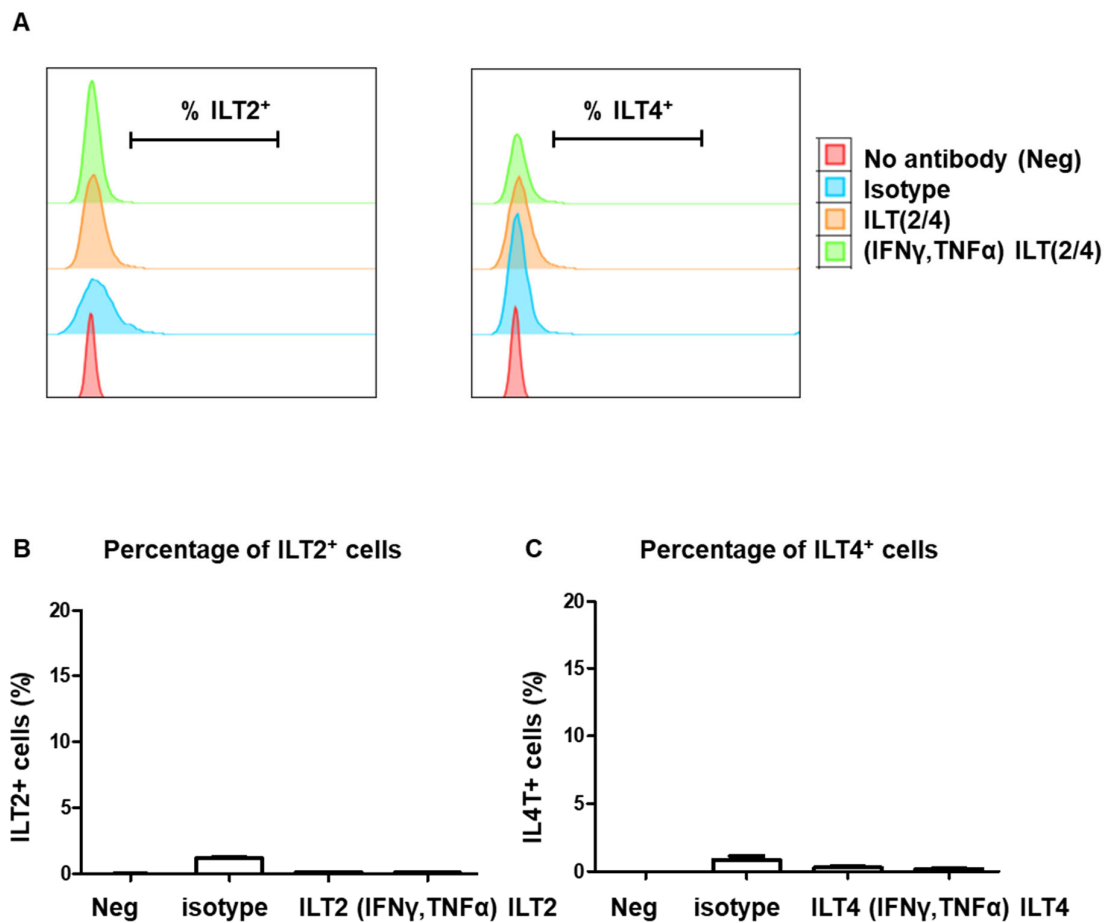

**Figure S6.** Cell-surface expression of the HLA-G receptors ILT2 and ILT4 in keratinocytes. Cell cultures were performed during 2 days in the absence or presence of 10 ng/mL of IFN $\gamma$  and 10 ng/mL TNF $\alpha$  to mimic an inflammatory context, and keratinocytes were analyzed for ILT2 and ILT4 cell-surface expression by flow cytometry. (A) Representative profiles are shown. Absence keratinocytes positive for both ILT2 (B) and ILT4 (C) cell-surface expression.
